# Supplementary material for: Preparation and characterization of an ultrathin carbon shell coating a silver core for shell-isolated nanoparticle-enhanced Raman spectroscopy
Source: Royal Society of Chemistry journal article supplement (doi:10.1039/c0cc05749e), 2011-01-01
Supplement: c0cc05749e.pdf [file c0cc05749e.pdf]

# Preparation and Characterization of Ultrathin Carbon Shell Coated on Silver Core for Shell-Isolated Nanoparticle-Enhanced Raman Spectroscopy

Donghui Yang,<sup>a</sup> Lixin Xia,<sup>\*a</sup> Hongping Zhao,<sup>a</sup> Xinhua Hu,<sup>b</sup> Yuan Liu,<sup>a</sup> Jushi Li<sup>a</sup> and  
Xiaofang Wan<sup>a</sup>

<sup>a</sup> College of Chemistry, Liaoning University, Shenyang 110036, China. Fax: 86 24 62202139;

Tel: 86 24 62202393; E-mail: [lixinxia@lnu.edu.cn](mailto:lixinxia@lnu.edu.cn)

<sup>b</sup> Dalian Institute of Chemical Physics, Chinese Academy of Sciences, Dalian 116023, China.

## SUPPLEMENTAL INFORMATION

**Materials and Sample Preparation.** All chemicals used were of reagent grade, and were used without further purification. Highly pure water with a resistivity higher than 18.0 MΩ cm was used in all the preparations. Silver sols were prepared using the Lee–Meisel method,<sup>1</sup> i.e., AgNO<sub>3</sub> (0.0169 g, 0.1 mmol) was dissolved in 100 mL of H<sub>2</sub>O and brought to a boil with vigorous stirring. To this, 2.6 mL of 1 wt% sodium citrate was quickly added under vigorous stirring. The mixture was kept boiling for 30 min and then cooled

---

<sup>1</sup> P. C. Lee and D. Meisel, *J. Phys. Chem.*, 1982, **86**, 3391.

<sup>2</sup> G. Socrates, *Infrared Characteristic Group Frequencies: Tables and Charts*, Second Edition, John Wiley & Sons, Chichester, 1994.

<sup>3</sup> C. J. Orendorff, A. Gole, T. K. Sau and C. J. Murphy, *Anal. Chem.*, 2005, **77**, 3261.

under ambient conditions.

To modify Ag sols with 4-mercaptobenzoic acid (4-MBA), an ethanolic solution of 4-MBA (2 mL, 1 mmol L<sup>-1</sup>) was added into 15 mL of the Ag sols under stirring for 24 h in order to allow the 4-MBA to completely reach adsorption equilibrium, followed by 5 min sonication in ethanol, rinsing with ethanol to remove excess reactants. After pH value of the mixture was adjusted by sodium hydroxide aqueous solution (20 wt%) to 9, Cetyltrimethyl ammonium bromide (CTAB) ethanol solution (21 mL, 1 mmol L<sup>-1</sup>) was subsequently added into to the system, and then the whole mixture was stirred for 24 h. Thus, CTAB was fabricated onto the 4-MBA adsorbed on the Ag sols via electrostatic interaction. Carbonization was performed by adding concentrated sulfuric acid (50 mL) into the system under stirring and heating at 90 °C for 15 min. After a thorough washing with water, CTAB was alternately adsorbed on the carbon films formed in the previous step via hydrophobic interaction and carbonized by using concentrated sulfuric acid for 4 times. The products were collected by centrifugation and washed several times with water and ethanol, and then dried under vacuum at room temperature for 4 h.

A borosilicate cover glass (diameter = 12 mm, Deckglaser) was soaked in a piranha solution [30% H<sub>2</sub>O<sub>2</sub>:98% H<sub>2</sub>SO<sub>4</sub> (1:3)] for 30 min and then sonicated in distilled water for 10 min, followed by rinsing with ethanol, and then finally dried in an oven at 70 °C for 20 min.

**Characterization.** Transmission electron microscopy (TEM) images were obtained using a Philips-FEI Tecnai F30 microscope. TEM samples were prepared by drying aqueous suspensions of the particles on carbon-coated TEM grids under ambient conditions. X-ray photoelectron spectroscopy (XPS) measurement was carried out with a Thermo VG

ESCALAB250 spectrometer with a monochromatic X-ray source of Al K $\alpha$  (1486.6 eV). Infrared spectrum of the sample was obtained using a Nicolet 5700 FT-IR spectrometer. X-ray powder diffraction (XRD) pattern of the carbon-coated Ag NPs was recorded with a D8ADVANCE powder diffractometer over a 2-theta range of 20–90° at an angular resolution of 0.02°. Ultraviolet/visible (UV/Vis) absorption spectra were obtained using a VARIAN Cary-5000 spectrophotometer. Raman measurements were performed with a Jobin Yvon LabRam HR 800 micro-Raman spectrometer equipped with a microscope (Panasonic Super DYNAMIC). Laser light at 632.8 nm was used as the excitation source.

**FTIR spectrum.** Fig. S1 shows the IR spectrum of the carbon-coated Ag nanoparticles (NPs). The characteristic IR peaks of alcohol appear at 3434, 2923, 2852, 1632, 1384, 1093, and 798 cm<sup>-1</sup>. The peaks at 3434, 1632, 1384, 1093, and 798 cm<sup>-1</sup> in Fig. S1 can be attributed to the O–H stretching vibration, in-plane O–H deformation vibration, C–H deformation vibration, C–O stretching vibration, and C–C skeletal stretching vibration of alcohol, respectively, while the bands at 2923 and 2852 cm<sup>-1</sup> are due to the C–H stretching vibration of alcohol.<sup>2</sup>

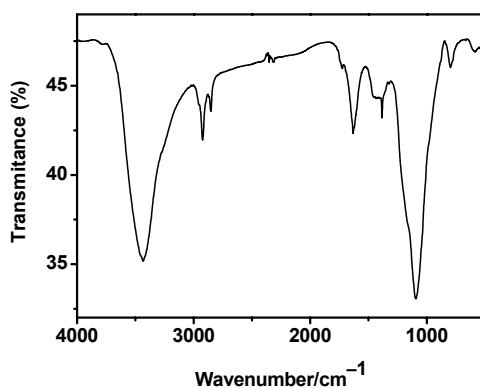

**Fig. S1** IR spectrum of the carbon-coated Ag NPs.

**XPS spectra.** The XPS spectrum of Br 3d in Fig. S2 shows that the binding energy of Br 3d is 68.2 eV, and consists of two individual peaks Br 3d<sub>3/2</sub> and Br 3d<sub>5/2</sub>, with binding energies ~68.75 and ~67.75 eV, respectively.

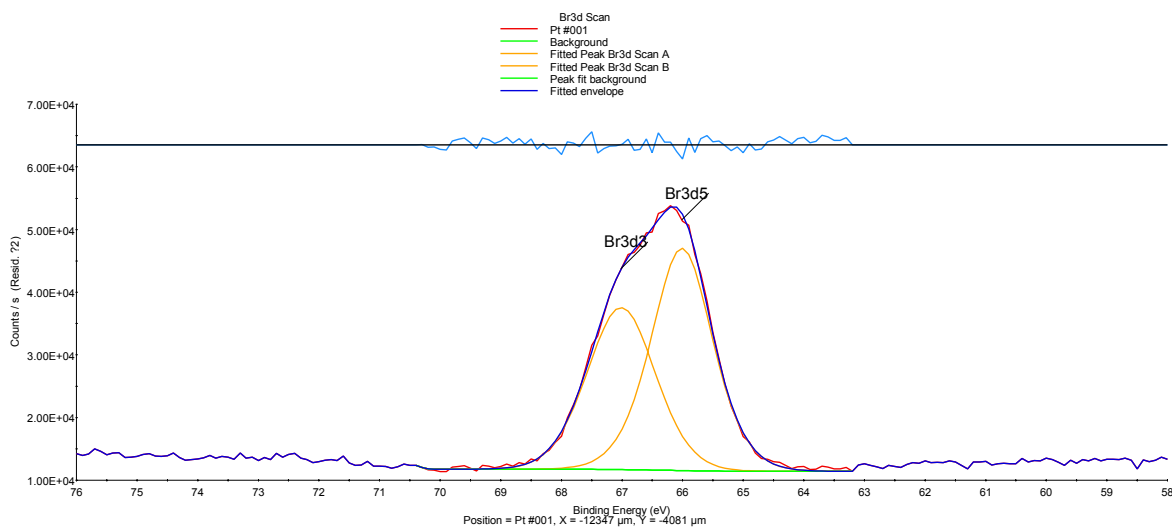

**Fig. S2** XPS pattern of sample in Br 3d spectral region.

The XPS spectrum of O 1s in Fig. S3 shows that the binding energy of O 1s is 530.3 eV.

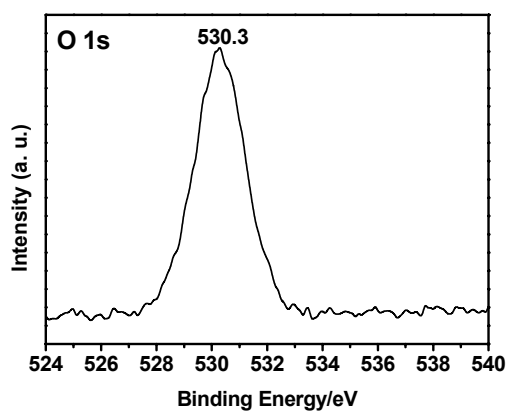

**Fig. S3** XPS pattern of sample in O 1s spectral region.

**UV/Vis spectra.** Fig. S4 shows the UV/Vis spectra of silver colloids and the carbon-coated Ag NPs.

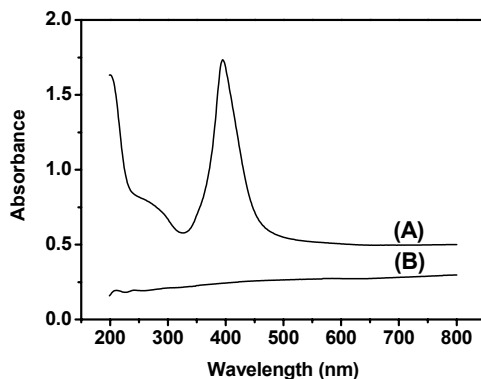

**Fig. S4** UV/Vis spectra of (A) silver colloids and (B) the carbon-coated Ag NPs.

**Enhancement factor.** We attempted to estimate the SERS enhancement factor (EF) using the following equation:

$$EF = (I_{\text{SERS}} / N_{\text{SERS}}) / (I_{\text{NR}} / N_{\text{NR}}) \quad (1)$$

where  $I_{\text{SERS}}$  denotes the SERS intensity of the  $\nu_{8a}$  band of 4-MBA adsorbed on the carbon-coated Ag NPs using 632.8 nm radiation as the excitation source,  $I_{\text{NR}}$  denotes the normal Raman scattering intensity of the same band of dry 4-MBA powder, and  $N_{\text{SERS}}$  and  $N_{\text{NR}}$  are the numbers of 4-MBA molecules effectively excited by the laser beam to obtain the corresponding SERS and NR spectra, respectively. We assumed that the sampling volume from which the NR spectrum of dry 4-MBA powder as shown in Fig. 3 (main text) was obtained was the product of the area of the laser spot ( $\sim 2 \mu\text{m}$  in diameter) and the penetration depth ( $\sim 2 \mu\text{m}$ ) of the focused beam. Since the density of 4-MBA was  $1.5 \text{ g cm}^{-3}$  and its molecular weight was  $154.19 \text{ g mol}^{-1}$ , the number of 4-MBA molecules effectively excited by the laser beam was calculated to be  $3.68 \times 10^{10}$  (i.e.,  $6.11 \times 10^{-14}$

mol). On the other hand, the bonding density of 4-MBA molecules in a self-assembled monolayer is  $\sim 0.5 \text{ nmol cm}^{-2}$ ;<sup>3</sup> therefore, the total number of molecules sampled in the SERS experiments using the carbon-coated Ag NPs as a substrate will be  $9.45 \times 10^6$  (i.e.,  $1.57 \times 10^{-17} \text{ mol}$ ). In this estimation, we assumed that the SERS signals of 4-MBA adsorbed on the carbon-coated Ag NPs were from a monolayer. The intensity ratio of the  $\nu_{8a}$  aromatic-ring vibration bands at  $\sim 1584 \text{ cm}^{-1}$  in Fig. 3 (main text) was measured to be 2.6:1 and was taken using 632.8 nm excitation and normalized with respect to the absolute intensity from a silicon wafer. The EF, estimated using 4-MBA as the probing adsorbate, was  $\sim 1 \times 10^4$ .
